# Supplementary material for: Explainable AI Reveals Statistical Associations Between Industrial Activity and PFAS Contamination of Public Water Systems
Source: Research Square preprint supplement (doi:10.21203/rs.3.rs-7935132/v1), 2025-11-06
Supplement: Supplementary file 1 [file bc26d8866661f423ecbd27e4.pdf]

# Explainable AI Reveals Statistical Associations Between Industrial Activity and PFAS Contamination of Public Water Systems

Priyanshu R Gupta<sup>1</sup>, Hogan Tyler Nance<sup>1</sup>, Khang Nguyen<sup>1</sup>, Mateo Srivathanakul<sup>1</sup>, Emily Tang<sup>1</sup>, Jaden C Deegan<sup>1</sup>, Raman Dhiman<sup>2</sup>, Manish Kumar<sup>1,2\*</sup>

<sup>1</sup> *Maseeh Department of Civil, Architectural and Environmental Engineering, The University of Texas at Austin,*

<sup>2</sup> *McKetta Department of Chemical Engineering, The University of Texas at Austin,*

## Table of Contents:

Table S1: Features used to construct watershed-level PFAS risk prediction

Table S2: Frequency of PFAS detections reported in UCMR5 (as of October 2024).

Table S3: Predictive Performance of the different ML architectures

Table S4: Performance of the Random Forest classification model trained for each of the 8 PFAS of interest and 1 SUMPFAS model.

Figure S1: Cross-validated ROC curves for the 8 PFAS-specific models and 1 SumPFAS model.

Figure S2: Full SHAP summary plot showing feature contributions across all subbasins.

Figure S3: Illustrative examples of prediction mismatches between model output and observed PFAS detection in UCMR 5.

**Table S1: Features used to construct watershed-level PFAS risk prediction.** The 30 predictors used in developing the model, including industrial sectors, waste management, AFFF users, and sociodemographic factors, are grouped into thematic categories by the authors. NAICS codes follow formal regulatory classifications, while the thematic feature groups were developed to aid interpretation of model outputs.

| S. no. | NAICS Code | NAICS Name / Feature Name                                                                      | Thematic Feature Group               |
|--------|------------|------------------------------------------------------------------------------------------------|--------------------------------------|
| 1      | 325199     | All Other Basic Organic Chemical Manufacturing                                                 | Chemical Manufacturing               |
| 2      | 325510     | Paint and Coating Manufacturing                                                                |                                      |
| 3      | 325611     | Soap and Other Detergent Manufacturing                                                         |                                      |
| 4      | 325612     | Polish and Other Sanitation Good Manufacturing                                                 |                                      |
| 5      | 325998     | All Other Miscellaneous Chemical Product and Preparation Manufacturing                         |                                      |
| 6      | 335999     | Miscellaneous Electrical Equipment Manufacturing                                               | Electronics & Electrical Equipment   |
| 7      | 334419     | Other Electronic Component Manufacturing                                                       |                                      |
| 8      | 334413     | Semiconductor and Related Device Manufacturing                                                 |                                      |
| 9      | 332812     | Metal Coating, Engraving (except Jewelry and Silverware), and Allied Services to Manufacturers | Metal Treatment & Fabrication        |
| 10     | 332813     | Electroplating, Plating, Polishing, Anodizing, and Coloring                                    |                                      |
| 11     | 332999     | Miscellaneous Fabricated Metal Product Manufacturing                                           |                                      |
| 12     | 324191     | Petroleum Lubricating Oil and Grease Manufacturing                                             | Petroleum & Petrochemical            |
| 13     | 324110     | Petroleum Refineries                                                                           |                                      |
| 14     | 326111     | Unlaminated Plastics Film and Sheet                                                            | Plastics & Polymer Products          |
| 15     | 325211     | Plastics Material and Resin Manufacturing                                                      |                                      |
| 16     | 326112     | Plastics Packaging Film and Sheet                                                              |                                      |
| 17     | 313210     | Broad woven Fabric Mills                                                                       | Textile, Paper & Printing            |
| 18     | 323111     | Commercial Printing (except Screen and Books)                                                  |                                      |
| 19     | 322121     | Paper (except Newsprint) Mills                                                                 |                                      |
| 20     | 562213     | Solid Waste Combustors and Incinerators                                                        | Waste Management & Chemical Handling |
| 21     | 424690     | Chemical and Allied Products Merchant Wholesalers                                              |                                      |
| 22     | 562112     | Hazardous Waste Collection                                                                     |                                      |
| 23     | 562219     | Hazardous Waste Treatment and Disposal                                                         |                                      |
| 24     | 562211     | Solid Waste Landfill                                                                           |                                      |
| 25     | 562219     | Other Nonhazardous Waste Treatment and Disposal                                                |                                      |
| 26     | -          | Military Bases                                                                                 | AFFF-users                           |
| 27     | -          | AFFF-certified Airports                                                                        |                                      |
| 28     | -          | Fire fighting training facilities                                                              |                                      |
| 29     | -          | Total Population                                                                               | Sociodemographic factors             |
| 30     | -          | Neighborhood Affluence                                                                         |                                      |

**Table S2: Frequency of PFAS detections reported in UCMR5 (as of October 2024).**

Number of detections reported for individual PFAS analytes in U.S. public water systems, based on EPA's Unregulated Contaminant Monitoring Rule 5 (UCMR5). The top 8 contaminants with >500 detections were selected for model development in this study.

| Name of Contaminant | Number of Detections reported |
|---------------------|-------------------------------|
| PFPeA               | 1891                          |
| PFBA                | 1752                          |
| PFHxA               | 1681                          |
| PFBS                | 1544                          |
| PFOS                | 1264                          |
| PFOA                | 1211                          |
| PFHxS               | 967                           |
| PFHpA               | 526                           |
| 6:2 FTS             | 163                           |
| PFNA                | 72                            |
| PFPeS               | 50                            |
| HFPO-DA             | 45                            |
| PFDA                | 14                            |
| 8:2 FTS             | 9                             |
| PFUnA               | 6                             |
| PFDoA               | 4                             |
| PFHpS               | 4                             |
| NFDHA               | 4                             |
| ADONA               | 3                             |
| 4:2 FTS             | 2                             |
| PFMPA               | 2                             |
| NMeFOSAA            | 1                             |
| 9CI-PF3ONS          | 1                             |
| NEtFOSAA            | 1                             |
| PFMBA               | 1                             |

**Table S3. Performance of the classification algorithm using different ML architectures across 8 PFAS-specific classifiers and 1 SUMPFAS model.** Mean accuracy, precision, recall, F1-score and Youden's J-Index are reported for models trained on individual PFAS compounds (e.g., PFOA, PFOS, PFBS) and for the aggregated "SUMPFAS" model. Values are reported at default threshold (0.5); optimized results (Youden's J-max) in parentheses.

| XGBoost |               |       |             |        |
|---------|---------------|-------|-------------|--------|
|         | Mean Accuracy | s.d.  | Mean AUCROC | s.d.   |
| SUMPFAS | 69.32%        | 0.23% | 0.76        | 0.0008 |
| PFPeA   | 75.62%        | 0.14% | 0.78        | 0.0016 |
| PFBA    | 68.68%        | 0.15% | 0.70        | 0.0026 |
| PFHxA   | 78.29%        | 0.16% | 0.80        | 0.0011 |
| PFBS    | 75.75%        | 0.10% | 0.79        | 0.0010 |
| PFOS    | 76.94%        | 0.13% | 0.75        | 0.0016 |
| PFOA    | 79.90%        | 0.14% | 0.79        | 0.0018 |
| PFHxS   | 77.15%        | 0.13% | 0.74        | 0.0026 |
| PFHpA   | 85.43%        | 0.23% | 0.75        | 0.0021 |

| Random Forest |               |       |             |        |
|---------------|---------------|-------|-------------|--------|
|               | Mean Accuracy | s.d.  | Mean AUCROC | s.d.   |
| SUMPFAS       | 71.97%        | 0.03% | 0.78        | 0.0007 |
| PFPeA         | 77.81%        | 0.15% | 0.81        | 0.0005 |
| PFBA          | 72.99%        | 0.20% | 0.75        | 0.0010 |
| PFHxA         | 79.56%        | 0.18% | 0.82        | 0.0006 |
| PFBS          | 76.69%        | 0.39% | 0.80        | 0.0027 |
| PFOS          | 79.07%        | 0.23% | 0.78        | 0.0010 |
| PFOA          | 82.41%        | 0.08% | 0.82        | 0.0013 |
| PFHxS         | 80.33%        | 0.14% | 0.76        | 0.0006 |
| PFHpA         | 87.73%        | 0.12% | 0.79        | 0.0026 |

| LightGBM |  |  |  |  |
|----------|--|--|--|--|
|----------|--|--|--|--|

|         | Mean Accuracy | s.d.  | Mean AUCROC | s.d.   |
|---------|---------------|-------|-------------|--------|
| SUMPFAS | 68.68%        | 0.09% | 0.75        | 0.0028 |
| PFPeA   | 75.69%        | 0.26% | 0.78        | 0.0027 |
| PFBA    | 69.63%        | 0.09% | 0.70        | 0.0009 |
| PFHxA   | 77.96%        | 0.39% | 0.80        | 0.0018 |
| PFBS    | 75.21%        | 0.12% | 0.78        | 0.0011 |
| PFOS    | 76.80%        | 0.17% | 0.74        | 0.0022 |
| PFOA    | 80.48%        | 0.18% | 0.78        | 0.0017 |
| PFHxS   | 77.68%        | 0.23% | 0.72        | 0.0037 |
| PFHpA   | 85.30%        | 0.08% | 0.74        | 0.0037 |

**Table S4: Performance of the Random Forest classification model trained for each of the 8 PFAS of interest and 1 SUMPFAS model.**

| Name of PFAS model | AUCROC | Accuracy | Specificity | Sensitivity | F1-Score |
|--------------------|--------|----------|-------------|-------------|----------|
| SUMPFAS            | 0.78   | 69.1%    | 0.74        | 0.74        | 0.74     |
| PFPeA              | 0.81   | 81.6%    | 0.86        | 0.70        | 0.78     |
| PFBA               | 0.75   | 75.7%    | 0.79        | 0.65        | 0.71     |
| PFHxA              | 0.82   | 81.6%    | 0.75        | 0.78        | 0.77     |
| PFBS               | 0.81   | 77.9%    | 0.73        | 0.85        | 0.79     |

|       |      |       |      |      |      |
|-------|------|-------|------|------|------|
| PFOS  | 0.77 | 73.5% | 0.75 | 0.67 | 0.71 |
| PFOA  | 0.82 | 83.8% | 0.86 | 0.79 | 0.83 |
| PFHxS | 0.75 | 75.7% | 0.79 | 0.65 | 0.71 |
| PFHpA | 0.78 | 86%   | 0.83 | 0.72 | 0.77 |

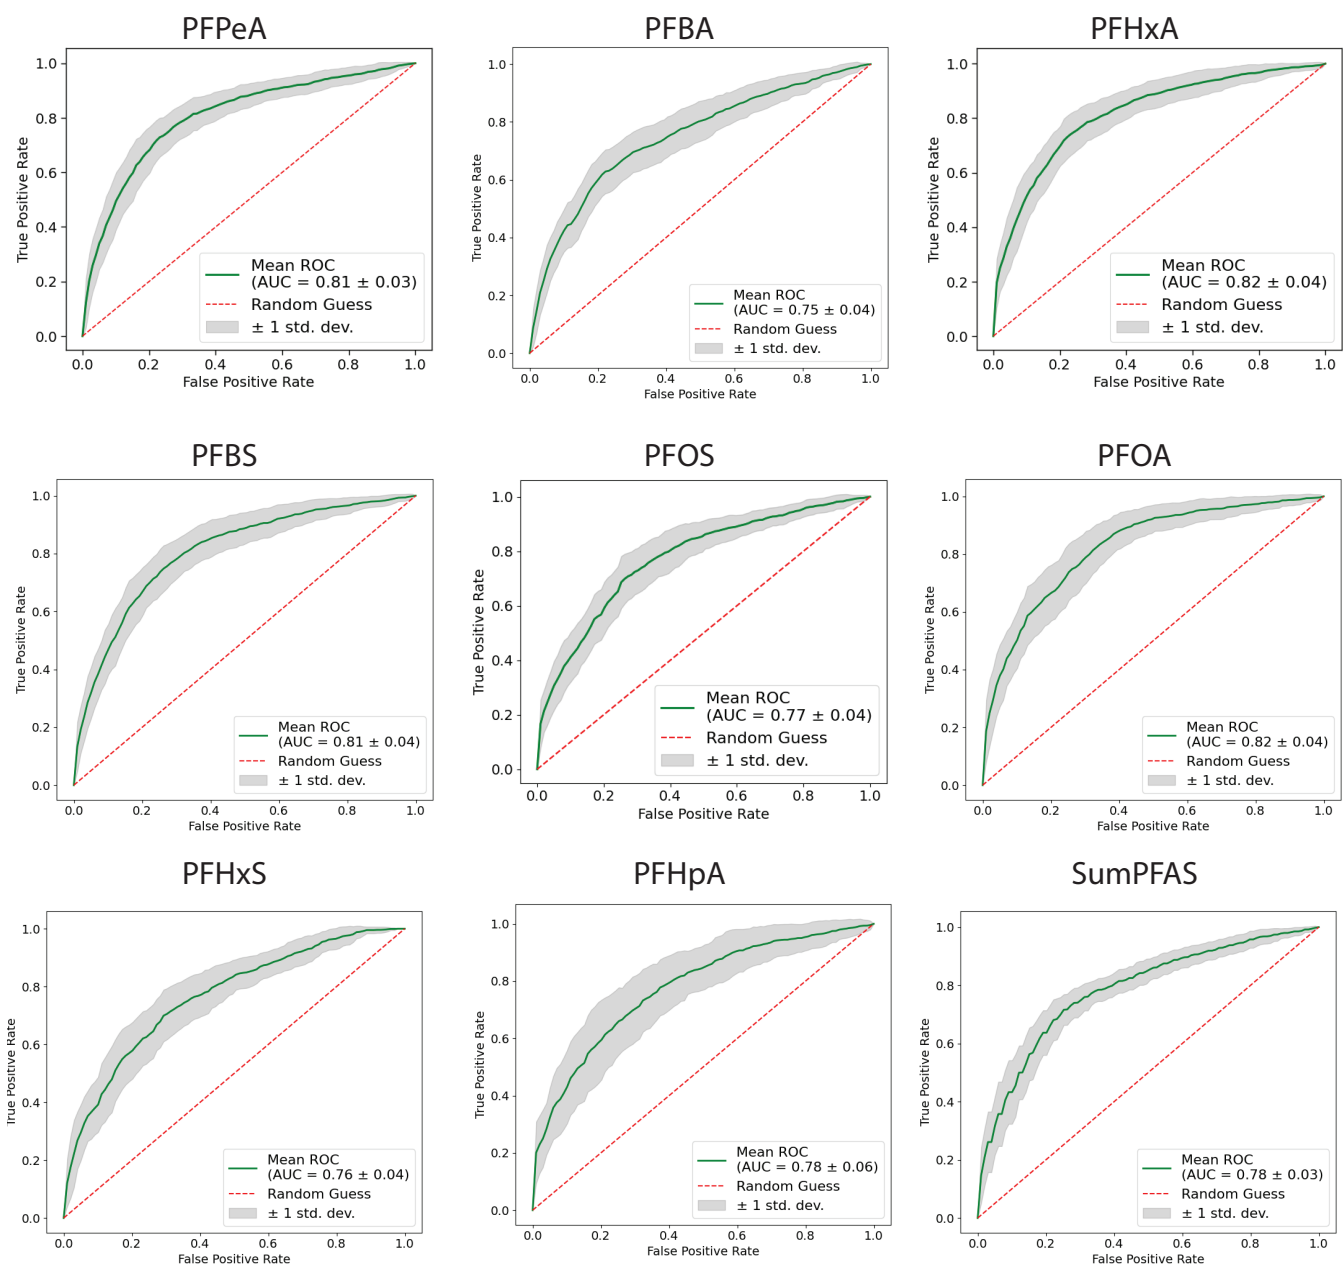

**Figure S1: Cross-validated ROC curves for SUMPFAS detection model.**

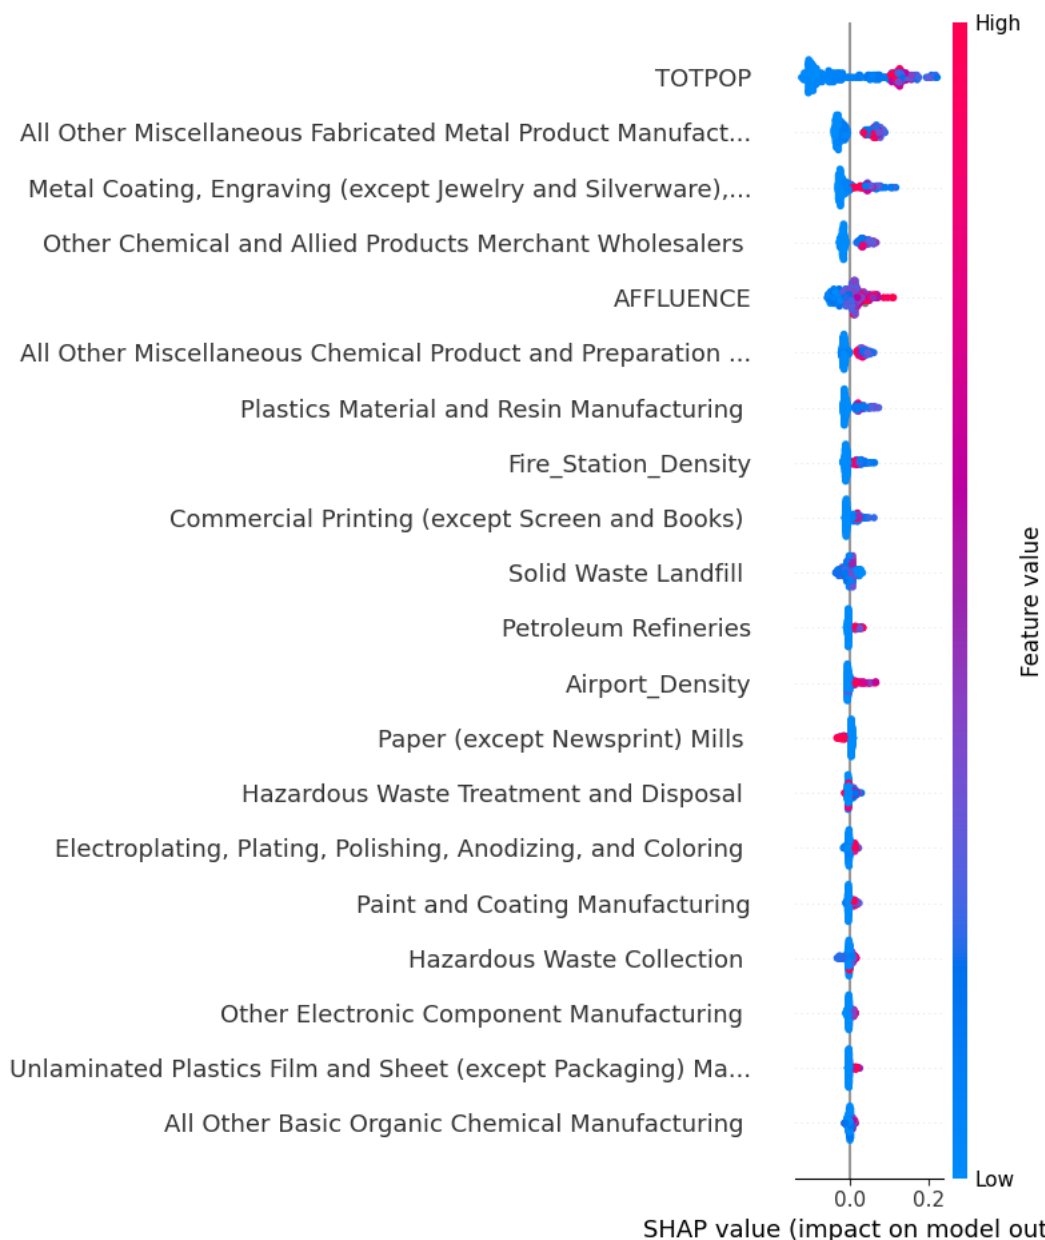

**Figure S2: Full SHAP summary plot showing feature contributions across all subbasins.** SHAP value distributions for all modeled features across all PWS subbasins in the national dataset. Each point represents the SHAP value for a feature in one subbasin, with color indicating the underlying feature magnitude. Positive SHAP values indicate a greater contribution to PFAS detection classification, while negative values push the prediction toward non-detection.

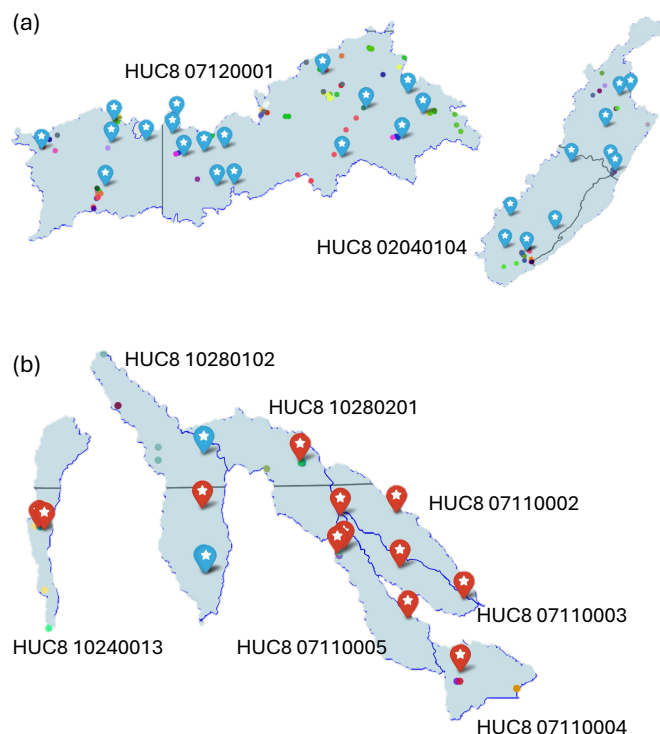

**Figure S3: Illustrative examples of prediction mismatches between model output and observed PFAS detection in UCMR 5.** (a) Exemplar HUC8 regions 07120001 and 02040104 with high modeled probability of PFAS detection (based on dense industrial presence), yet no PFAS detections reported in any of the PWSs (blue star marker) reported in UCMR5 measurements. The false positives from our model may reflect regions with effective treatment technologies, robust source protection by the PWSs, or under-reporting in the current sampling round. (b) HUC8 regions with minimal or no modeled industrial activity (of sectors used in this study), where model predicts non-detection, yet UCMR5 results confirm PFAS presence in all cases. These false negatives could indicate missing sources such as legacy contamination, surface runoffs, long distance transport, or non-industrial contributors like septic systems or biosolids. These examples highlight the limitations in input data in this study, pointing to the need for more comprehensive source inventories and representation of diffused contamination pathways.
